# Supplementary material for: Rate of detection of serrated lesions at colonoscopy in an average-risk population: a meta-analysis of 129,001 individuals
Source: PubMed Central journal article supplement — Endosc Int Open. 2021 Feb 19;9(3):E472–81. doi: 10.1055/a-1333-1776 (PMC7895666; doi:10.1055/a-1333-1776), 2021-02-19

## Supplementary material

### SUPPLEMENTARY MATERIAL

**Supplementary Fig. 1** Overall detection rate for serrated lesions.

**Supplementary Fig. 2** Overall detection rate for sessile serrated polyps.

**Supplementary Fig. 3** Overall detection rate for traditional serrated adenoma.

**Supplementary Fig. 4** Detection rate for serrated lesions by gender.

**Supplementary Fig. 5** Detection rate for sessile serrated polyps by gender.

**Supplementary Fig. 6** Detection rate for serrated lesions in proximal colon.

**Supplementary Fig. 7** Detection rate for serrated lesions by ethnicity.

**Supplementary Fig. 8** Detection rate for sessile serrated polyps by ethnicity.

**Supplementary Fig. 9** Detection rate for serrated lesions, sessile serrated polyps, and traditional serrated adenomas by region.

**Supplementary Fig. 10** Results of sensitivity analysis.

**Supplementary Fig. 11** Begg's funnel plots with pseudo 95% confidence limits.

## Supplementary material

### Supplementary Table 1 Search strategies used in the study.

| No. | Syntax                                                                                                                                                                                         |
|-----|------------------------------------------------------------------------------------------------------------------------------------------------------------------------------------------------|
| 1   | Rectal Neoplasms/ or Colorectal Neoplasms/ or Colonic Polyps/ or Colonic Neoplasms.mp.                                                                                                         |
| 2   | ((((colon* or rectal or colorectal) adj (cancer* or neoplasia* or tumor* or tumour* or carcinoma* or sarcoma* or adenoma* or adenocarcinoma* or lesion* or polyp*)) or CRC or serrated).ti,ab. |
| 3   | Colonoscopy/ or Pathology/ or Histology/ or colonoscoy*/ or patholog*/ or histolog*.mp.                                                                                                        |
| 4   | Prevalence.mp. or *prevalence/                                                                                                                                                                 |
| 5   | epidemiology/                                                                                                                                                                                  |
| 6   | epidemiology*.tw.                                                                                                                                                                              |
| 7   | 1 or 2                                                                                                                                                                                         |
| 8   | 4 or 5 or 6 or 7                                                                                                                                                                               |
| 9   | 3 and 7 and 8                                                                                                                                                                                  |
| 10  | limit 9 to (comment or editorial or letter or review)                                                                                                                                          |
| 11  | 9 not 10                                                                                                                                                                                       |
| 12  | limit 11 to humans                                                                                                                                                                             |

## Supplementary material

**Supplementary Table 2** PRISMA checklist for the study.

| Section/topic                      | # Checklist item                                                                                                                                                                                                                                                                                              | Reported on page # |
|------------------------------------|---------------------------------------------------------------------------------------------------------------------------------------------------------------------------------------------------------------------------------------------------------------------------------------------------------------|--------------------|
| <b>Title</b>                       |                                                                                                                                                                                                                                                                                                               |                    |
| Title                              | 1 Identify the report as a systematic review, meta-analysis, or both.                                                                                                                                                                                                                                         | 1                  |
| <b>Abstract</b>                    |                                                                                                                                                                                                                                                                                                               |                    |
| Structured summary                 | 2 Provide a structured summary including, as applicable: background; objectives; data sources; study eligibility criteria, participants, and interventions; study appraisal and synthesis methods; results; limitations; conclusions and implications of key findings; systematic review registration number. | 3                  |
| <b>Introduction</b>                |                                                                                                                                                                                                                                                                                                               |                    |
| Rationale                          | 3 Describe the rationale for the review in the context of what is already known.                                                                                                                                                                                                                              | 5                  |
| Objectives                         | 4 Provide an explicit statement of questions being addressed with reference to participants, interventions, comparisons, outcomes, and study design (picos).                                                                                                                                                  | 6                  |
| <b>Methods</b>                     |                                                                                                                                                                                                                                                                                                               |                    |
| Protocol and registration          | 5 Indicate if a review protocol exists, if and where it can be accessed (e.g., web address), and, if available, provide registration information including registration number.                                                                                                                               | 7                  |
| Eligibility criteria               | 6 Specify study characteristics (e.g., picos, length of follow-up) and report characteristics (e.g., years considered, language, publication status) used as criteria for eligibility, giving rationale.                                                                                                      | 7                  |
| Information sources                | 7 Describe all information sources (e.g., databases with dates of coverage, contact with study authors to identify additional studies) in the search and date last searched.                                                                                                                                  | 7                  |
| Search                             | 8 Present full electronic search strategy for at least one database, including any limits used, such that it could be repeated.                                                                                                                                                                               | 7                  |
| Study selection                    | 9 State the process for selecting studies (i.e., screening, eligibility, included in systematic review, and, if applicable, included in the meta-analysis).                                                                                                                                                   | 7                  |
| Data collection process            | 10 Describe method of data extraction from reports (e.g., piloted forms, independently, in duplicate) and any processes for obtaining and confirming data from investigators.                                                                                                                                 | 7-8                |
| Data items                         | 11 List and define all variables for which data were sought (e.g., picos, funding sources) and any assumptions and simplifications made.                                                                                                                                                                      | 8                  |
| Risk of bias in individual studies | 12 Describe methods used for assessing risk of bias of individual studies (including specification of whether this was done at the study or outcome level), and how this information is to be used in                                                                                                         | 8                  |

## Supplementary material

|                               |          |                                                                                                                                                                                                          |                           |
|-------------------------------|----------|----------------------------------------------------------------------------------------------------------------------------------------------------------------------------------------------------------|---------------------------|
|                               |          | any data synthesis.                                                                                                                                                                                      |                           |
| Summary measures              | 13       | State the principal summary measures (e.g., risk ratio, difference in means).                                                                                                                            | 8-9                       |
| Synthesis of results          | 14       | Describe the methods of handling data and combining results of studies, if done, including measures of consistency (e.g., $I^2$ ) for each meta-analysis.                                                | 9                         |
| <hr/>                         |          |                                                                                                                                                                                                          |                           |
| <b>Section/topic</b>          | <b>#</b> | <b>Checklist item</b>                                                                                                                                                                                    | <b>Reported on page #</b> |
| Risk of bias across studies   | 15       | Specify any assessment of risk of bias that may affect the cumulative evidence (e.g., publication bias, selective reporting within studies).                                                             | 9                         |
| Additional analyses           | 16       | Describe methods of additional analyses (e.g., sensitivity or subgroup analyses, meta-regression), if done, indicating which were pre-specified.                                                         | 9                         |
| <b>Results</b>                |          |                                                                                                                                                                                                          |                           |
| Study selection               | 17       | Give numbers of studies screened, assessed for eligibility, and included in the review, with reasons for exclusions at each stage, ideally with a flow diagram.                                          | 10                        |
| Study characteristics         | 18       | For each study, present characteristics for which data were extracted (e.g., study size, picos, follow-up period) and provide the citations.                                                             | 10-11                     |
| Risk of bias within studies   | 19       | Present data on risk of bias of each study and, if available, any outcome level assessment (see item 12).                                                                                                | 11                        |
| Results of individual studies | 20       | For all outcomes considered (benefits or harms), present, for each study: (a) simple summary data for each intervention group (b) effect estimates and confidence intervals, ideally with a forest plot. | 11                        |
| Synthesis of results          | 21       | Present results of each meta-analysis done, including confidence intervals and measures of consistency.                                                                                                  | 11-12                     |
| Risk of bias across studies   | 22       | Present results of any assessment of risk of bias across studies (see item 15).                                                                                                                          | 11                        |
| Additional analysis           | 23       | Give results of additional analyses, if done (e.g., sensitivity or subgroup analyses, meta-regression [see item 16]).                                                                                    | 11-12                     |
| <b>Discussion</b>             |          |                                                                                                                                                                                                          |                           |
| Summary of evidence           | 24       | Summarize the main findings including the strength of evidence for each main outcome; consider their relevance to key groups (e.g., healthcare providers, users, and policy makers).                     | 13-15                     |
| Limitations                   | 25       | Discuss limitations at study and outcome level (e.g., risk of bias), and at review-level (e.g., incomplete retrieval of identified research, reporting bias).                                            | 15                        |
| Conclusions                   | 26       | Provide a general interpretation of the results in the context of other evidence, and implications for future research.                                                                                  | 16                        |
| <b>Funding</b>                |          |                                                                                                                                                                                                          |                           |
| Funding                       | 27       | Describe sources of funding for the systematic review and other support (e.g., supply of data); role of funders for the systematic review.                                                               | 2                         |

From: Moher D, Liberati A, Tetzlaff J, Altman DG, The PRISMA Group (2009). Preferred Reporting Items for Systematic Reviews and Meta-

Analyses: The PRISMA Statement. PLoS Med 6(6): e1000097. doi:10.1371/journal.pmed1000097  
For more information, visit: [www.prisma-statement.org](http://www.prisma-statement.org).

## Supplementary material

**Supplementary Fig. 1** Overall detection rate for serrated lesions.

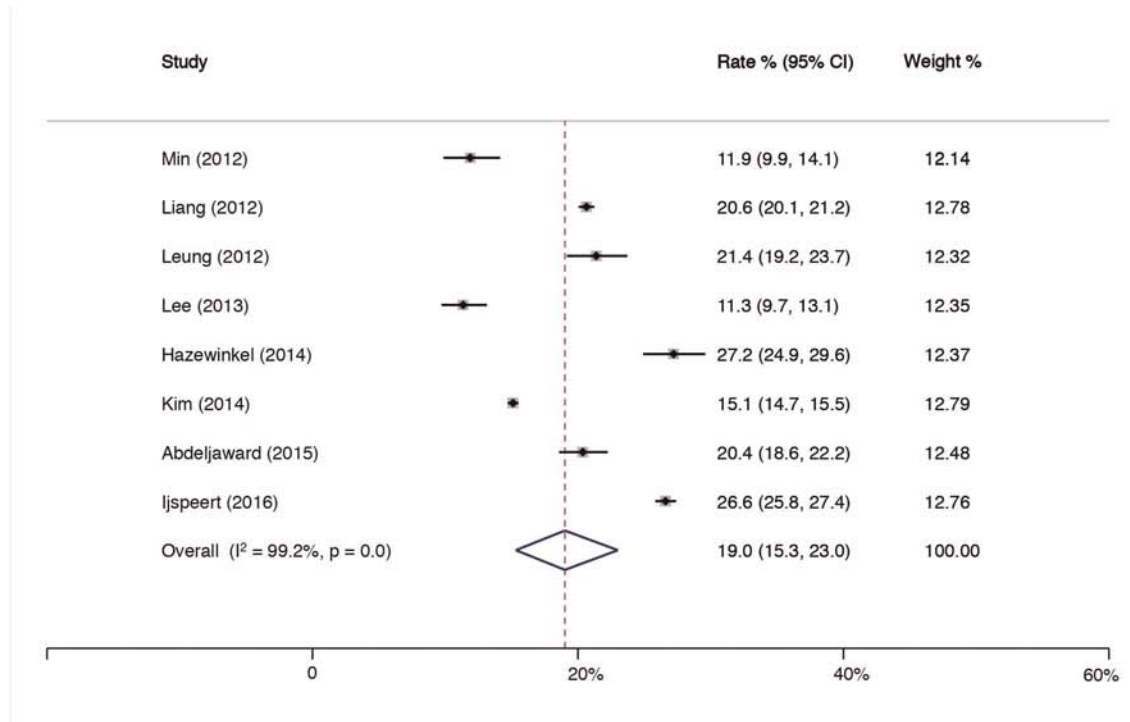

**Supplementary Fig. 2** Overall detection rate for sessile serrated polyps.

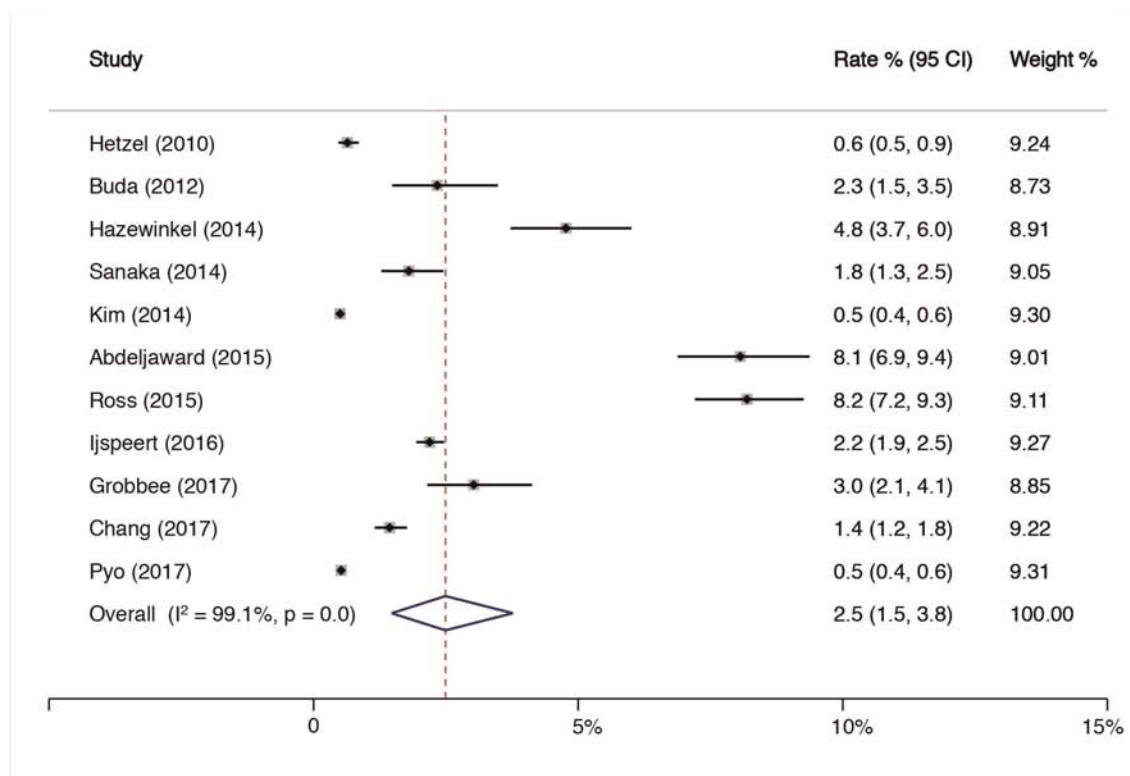

## Supplementary material

Supplementary Fig. 3 Overall detection rate for traditional serrated adenoma.

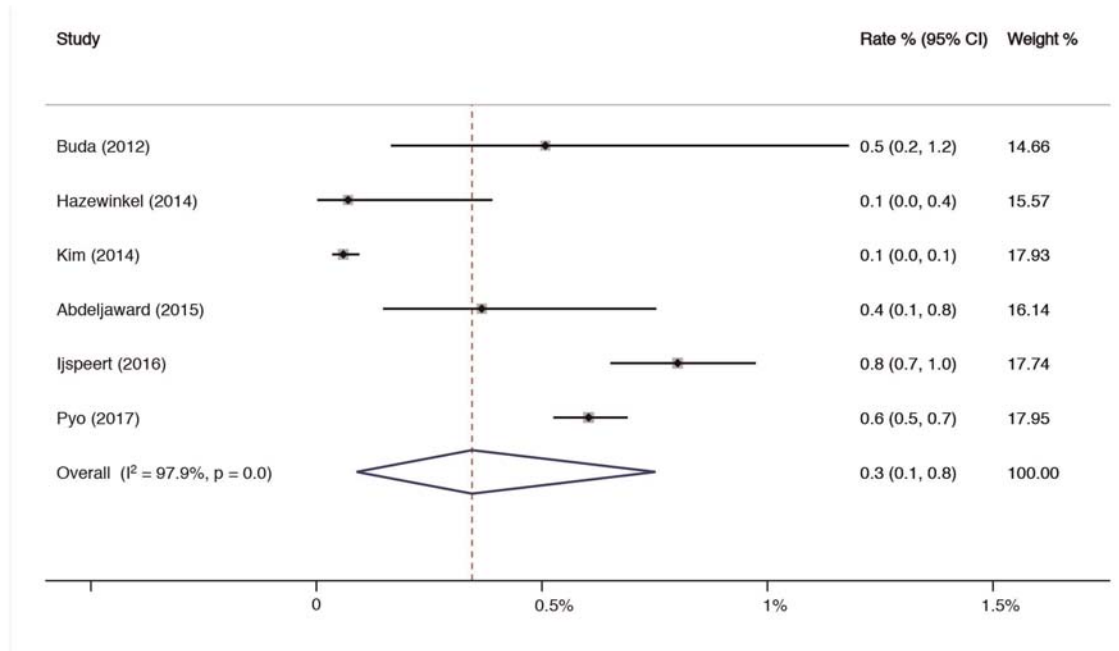

Supplementary Fig. 4 Detection rate for serrated lesions by gender.

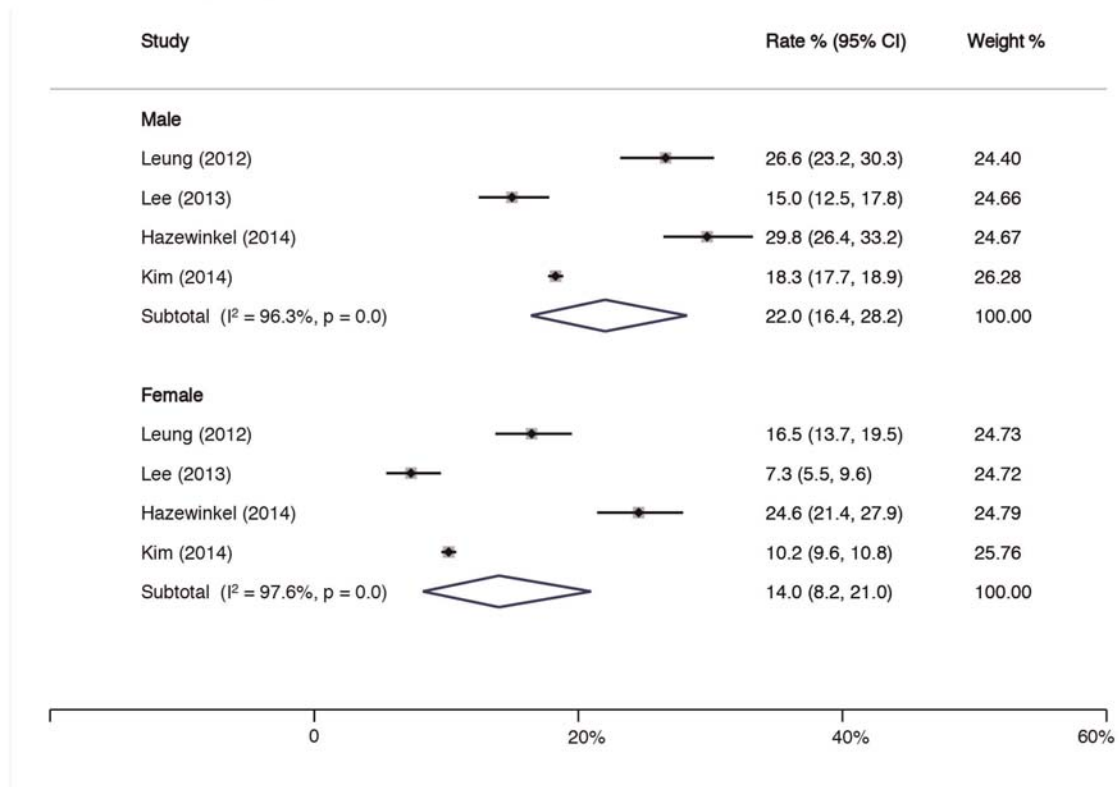

## Supplementary material

Supplementary Fig. 5 Detection rate for sessile serrated polyps by gender.

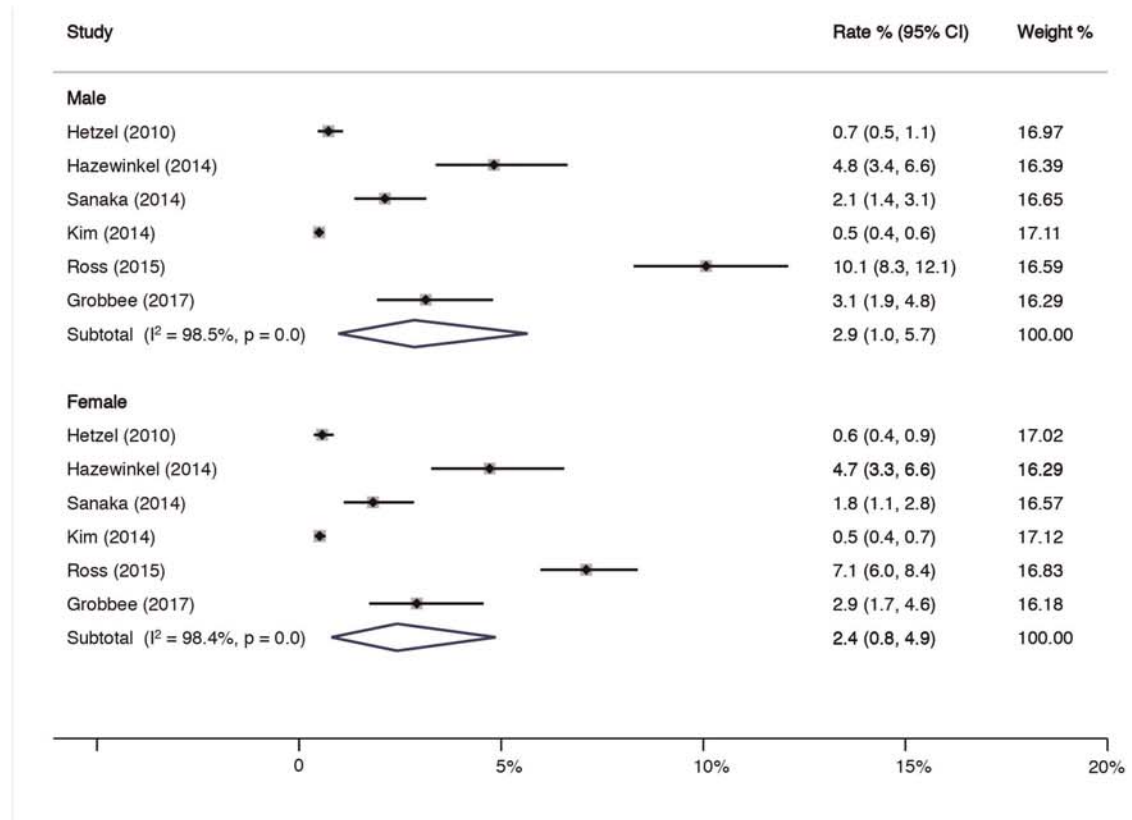

Supplementary Fig. 6 Detection rate for serrated lesions in proximal colon.

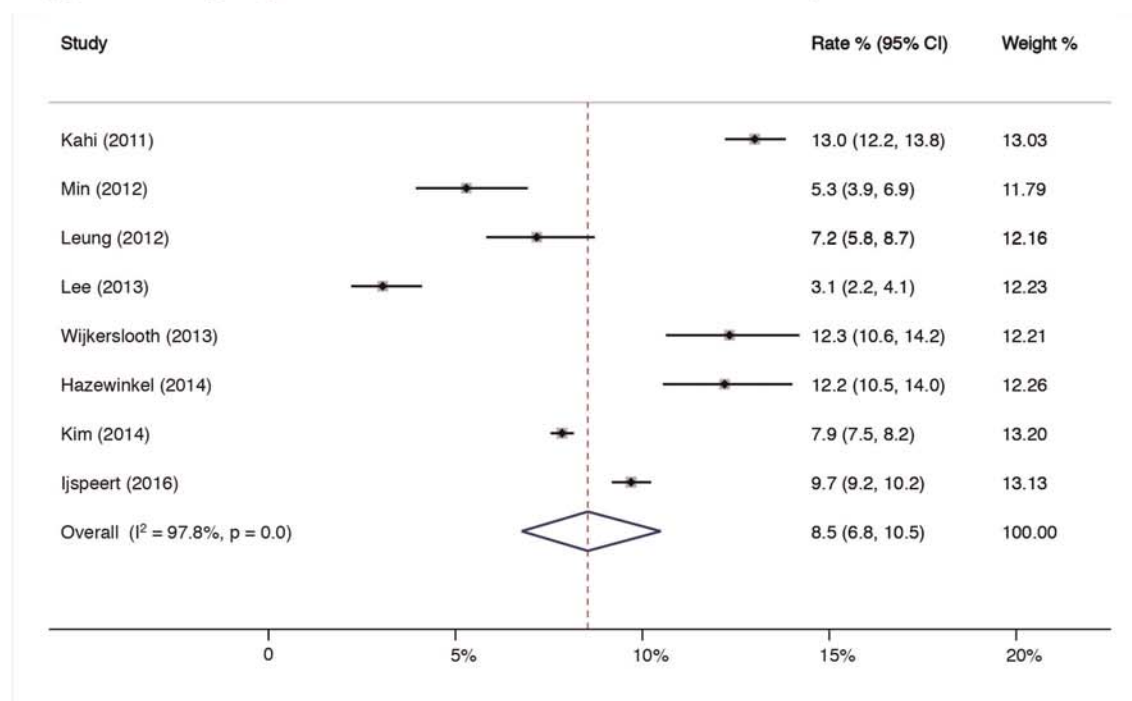

## Supplementary material

Supplementary Fig. 7 Detection rate for serrated lesions by ethnicity.

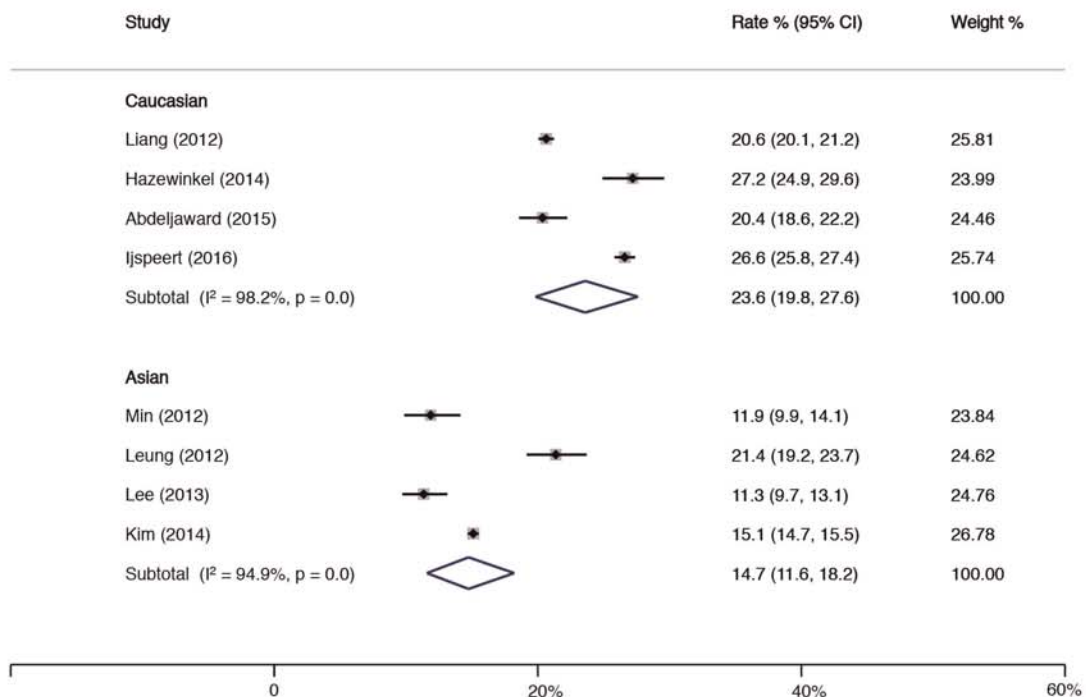

Supplementary Fig. 8 Detection rate for sessile serrated polyps by ethnicity.

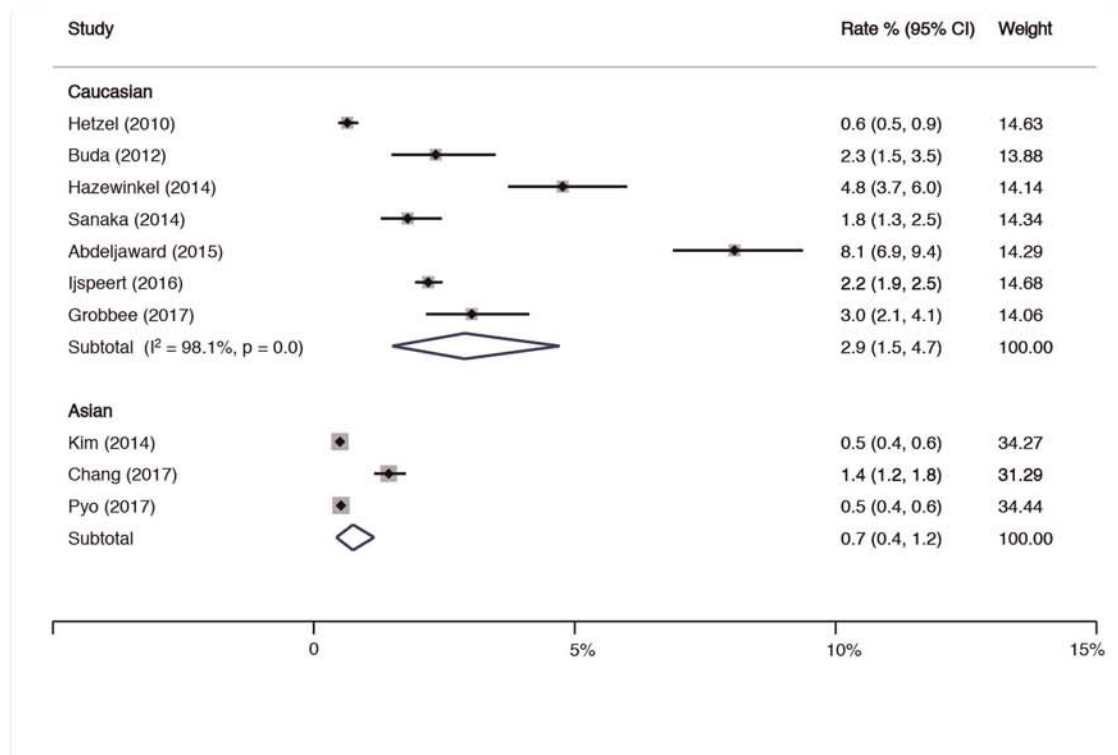



## Supplementary material

**Supplementary Figure 9.** Detection rate of serrated lesions, sessile serrated polyps, and traditional serrated adenomas by region

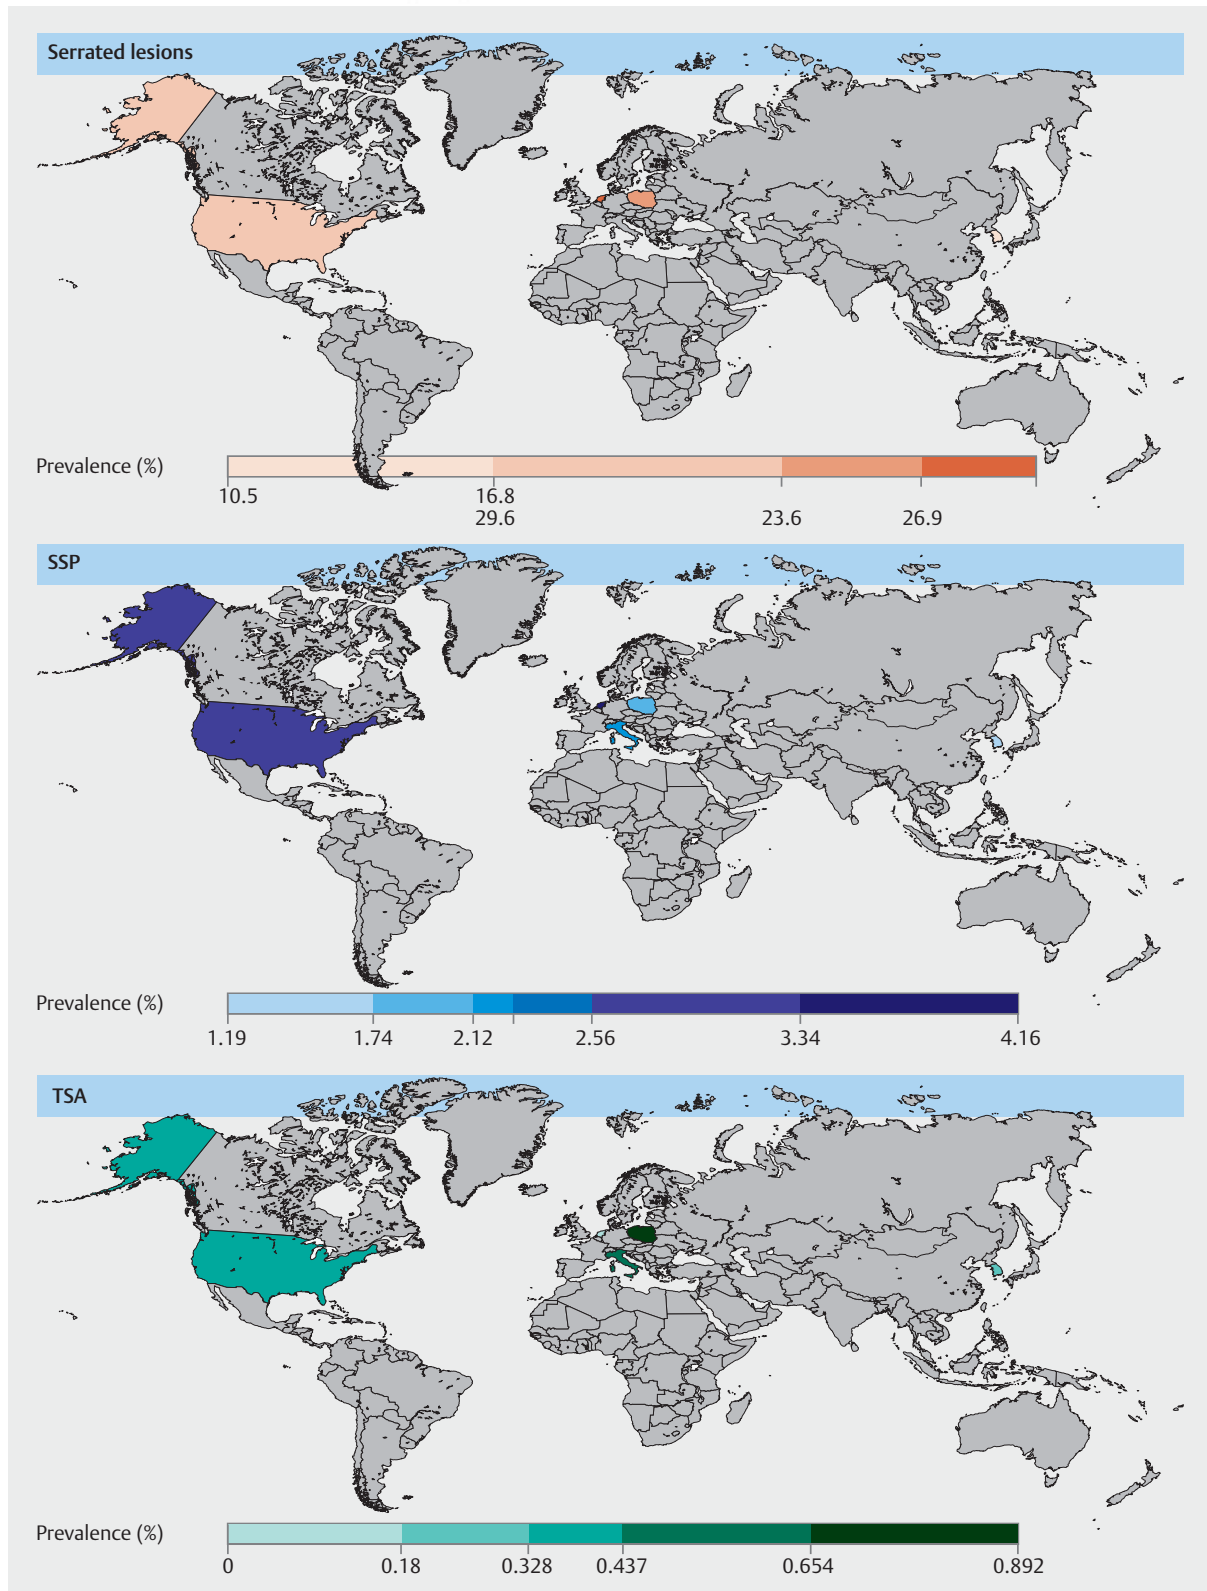

## Supplementary material

Supplementary Fig. 10 Results of sensitivity analysis.

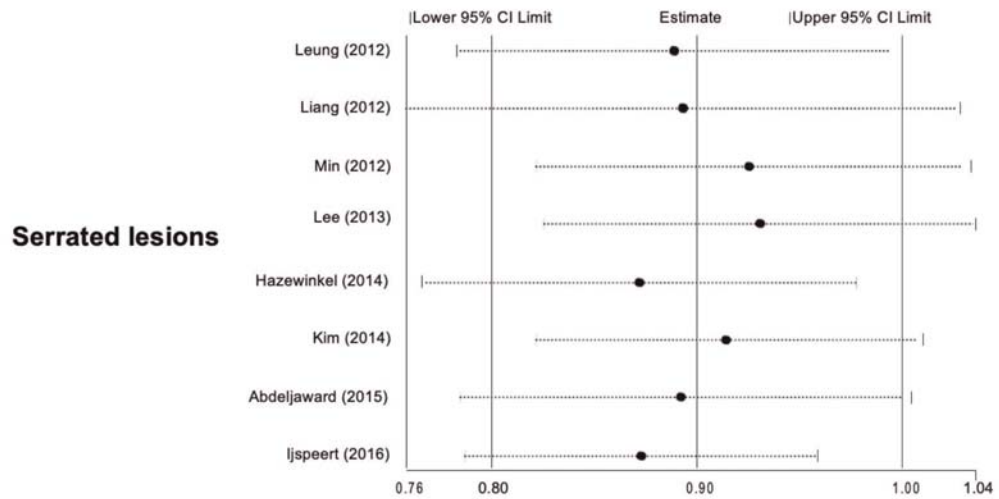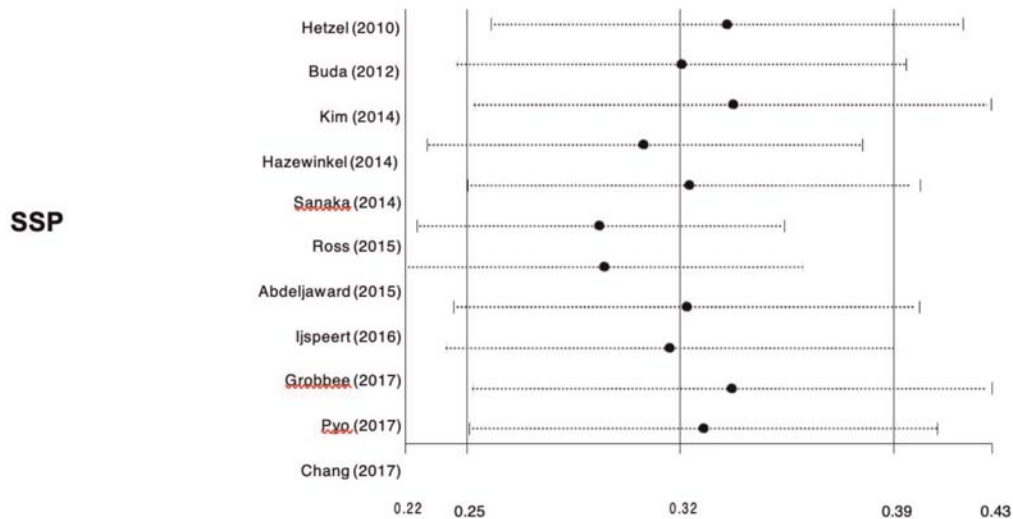

## Supplementary material

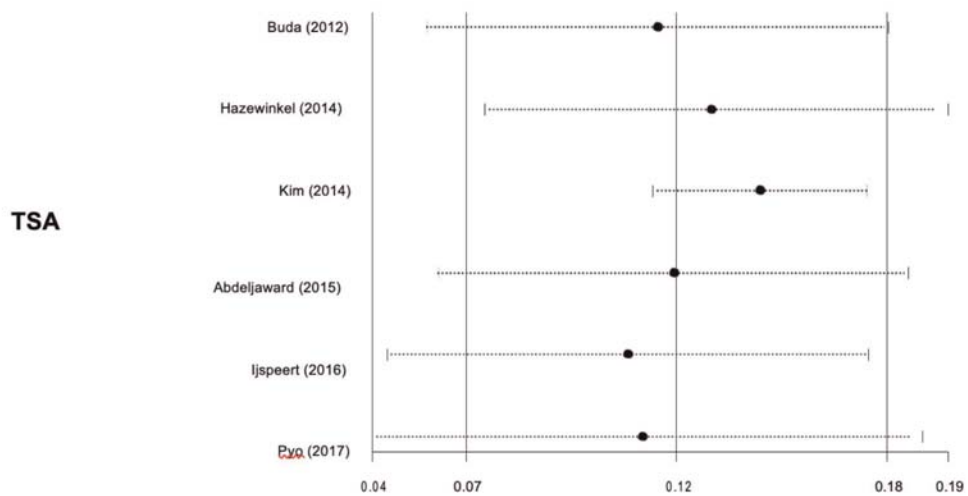

Supplementary Fig. 11 Begg's funnel plots with pseudo 95% confidence limits.

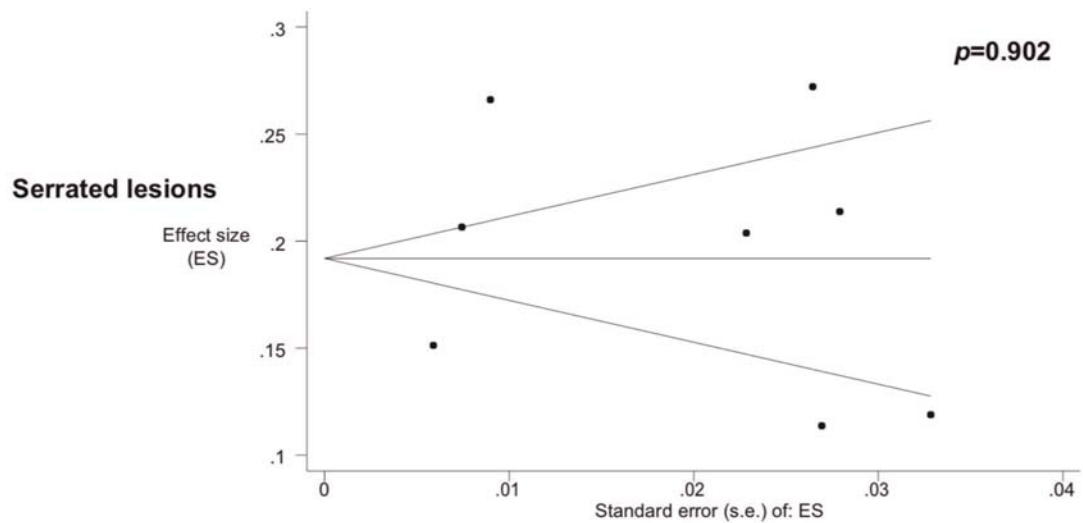

## Supplementary material

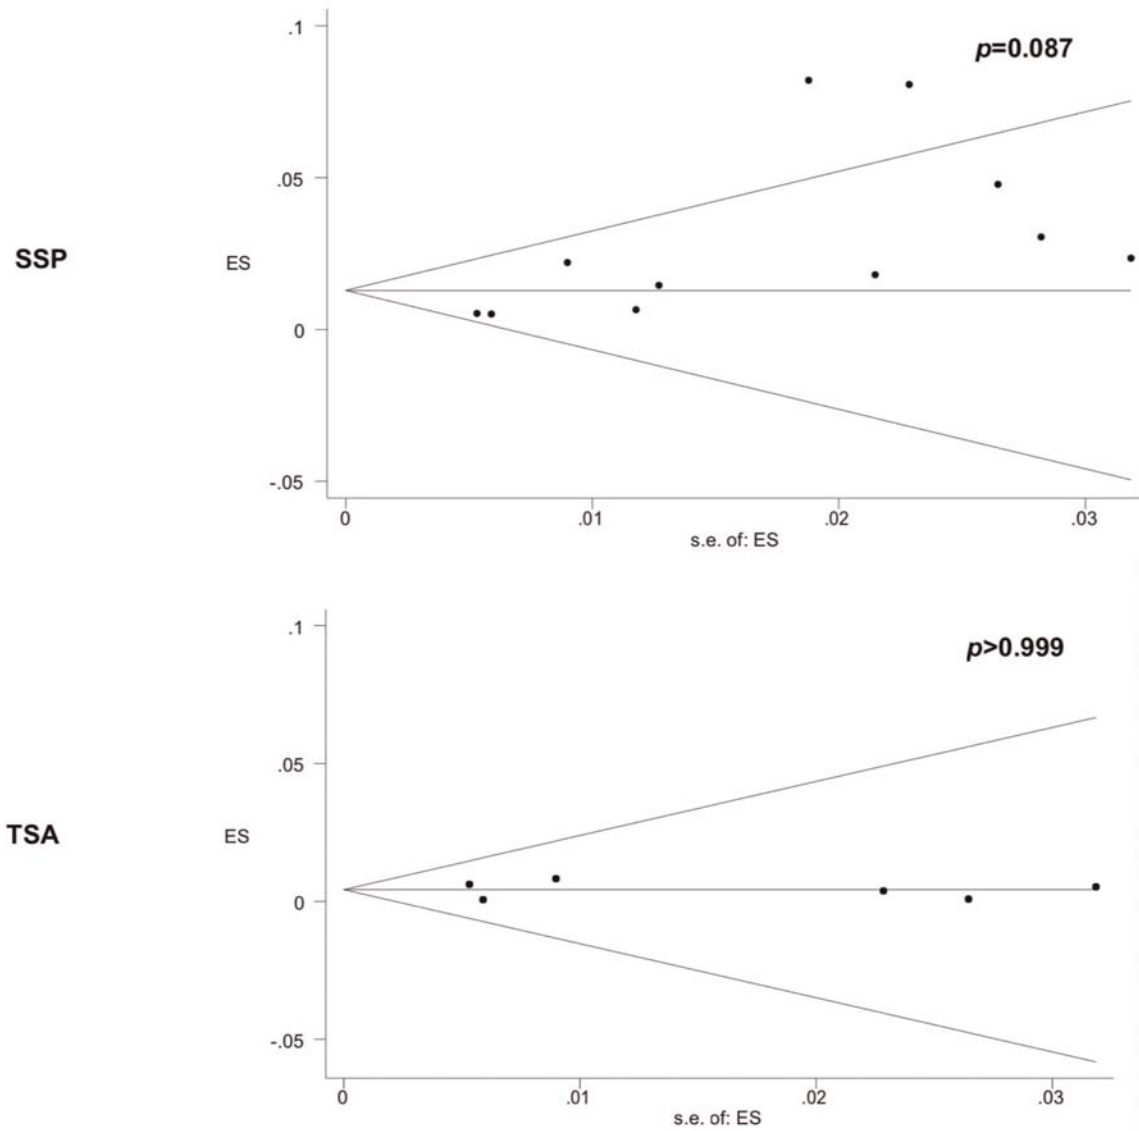

Supplement: 2099supmat_10-1055-a-1333-1776.pdf [file 2099supmat_10-1055-a-1333-1776.pdf]
